# Supplementary material
Source: HighWire-hosted journal article supplement (https://tobaccocontrol.bmj.com/content/28/6/657)
Supplement: inline-supplementary-material-1 [file inline-supplementary-material-1.pdf]

## Appendix A

### Interview Guide

1. Have you seen any change in tobacco sales since the tax increase?
2. Have you heard any concerns from customers or other merchants about the price increase?
3. Have you noticed a change in how many coupons customers are using on tobacco products?
4. Have tobacco representatives been offering promotions on tobacco products?
5. Are there any resources that might help you or other merchants that are feeling the effects of the new cigarette tax?
